# Supplementary material for: Growth and Influence of White-Rot Fungi on the Chemical Composition of Wheat Straw Inoculated under Varying Pre-Conditions
Source: MDPI journal article supplement (doi:10.3390/fermentation8120695), 2022-11-30
Supplement: s1 [file s1]

## Supplementary Materials Tables

**Table S1.** Neutral-detergent fibre content (g/kg DM) in the different fungal treatments after varying storage time (d).

| Strain | <i>Po</i> PO 93 | <i>Po</i> PO 93 | <i>Po</i> 411 | <i>Cs</i> 347 | <i>Cs</i> 347 | <i>Vv</i>   | uninoculated |
|--------|-----------------|-----------------|---------------|---------------|---------------|-------------|--------------|
|        | drained         | remoistened     | drained       | drained       | remoistened   | remoistened | remoistened  |
| Trial  | 1               | 3               | 1             | 1             | 3             | 2           | 2            |
| 0 d    | 845             | 775             | 845           | 845           | 766           | 781         | 787          |
| 5 d    |                 | 791             |               |               | 788           |             |              |
| 7 d    | 850             | 788             | 843           | 863           | 784           | 781         |              |
| 10 d   |                 | 777             |               |               | 784           |             |              |
| 14 d   | 853             | 767             | 829           | 839           | 776           | 769         | 790          |
| 21 d   | 815             |                 | 812           | 812           |               | 787         | 782          |
| 28 d   | 818             |                 | 802           | 828           |               | 784         | 785          |
| 35 d   | 818             |                 | 817           | 796           |               |             |              |
| 42 d   | 816             |                 | 804           | 788           |               |             |              |
| mean   | 826             | 780             | 810           | 821           | 780           | 780         | 786          |
| SEM    | 5.36            | 11.5            | 21.3          | 5.6           | 13.7          | 3.53        | 6.90         |

*P.o. Pleurotus ostreatus*, *C.s. Ceriporiopsis subvermispota*, *V.v. Volvariella volvacea*. SEM standard error of the means.

**Table S2.** Acid-detergent fibre content (g/kg DM) in the different fungal treatments after varying storage time (d).

| Strain | <i>Po</i> PO 93 | <i>Po</i> PO 93 | <i>Po</i> 411 | <i>Cs</i> 347 | <i>Cs</i> 347 | <i>Vv</i>   | uninoculated |
|--------|-----------------|-----------------|---------------|---------------|---------------|-------------|--------------|
|        | drained         | remoistened     | drained       | drained       | remoistened   | remoistened | remoistened  |
| Trial  | 1               | 3               | 1             | 1             | 3             | 2           | 2            |
| 0 d    | 573             | 469             | 573           | 573           | 460           | 468         | 475          |
| 5 d    |                 | 479             |               |               | 495           |             |              |
| 7 d    | 566             | 499             | 527           | 511           | 490           | 505         |              |
| 10 d   |                 | 490             |               |               | 496           |             |              |
| 14 d   | 539             | 486             | 492           | 516           | 496           | 493         | 554          |
| 21 d   | 497             |                 | 487           | 509           |               | 500         | 554          |
| 28 d   | 514             |                 | 508           | 514           |               | 492         | 561          |
| 35 d   | 526             |                 | 489           | 511           |               |             |              |
| 42 d   | 489             |                 | 511           | 524           |               |             |              |
| mean   | 523             | 485             | 506           | 520           | 487           | 492         | 536          |
| SEM    | 6.38            | 21.2            | 23.2          | 6.70          | 16.9          | 14.5        | 9.47         |

*P.o. Pleurotus ostreatus*, *C.s. Ceriporiopsis subvermispota*, *V.v. Volvariella volvacea*. SEM standard error of the means

**Table S3.** Significance of effects on chemical parameters and microbial counts in drained inoculated straw (Trial 1).

| Parameter     | Fungal strain | Storage duration | Strain*duration |
|---------------|---------------|------------------|-----------------|
| pH            | ***           | ***              | ***             |
| Ergosterol    | ***           | ***              | ***             |
| Hemicellulose | o             | **               | ***             |
| Cellulose     | o             | ***              | **              |
| ADL           | *             | **               | ***             |
| NFC           | **            | ***              | **              |
| NDFD30        | ns            | ***              | *               |
| ELOS          | *             | **               | **              |
| HFT           | *             | ***              | ***             |

|                                |     |     |     |  |
|--------------------------------|-----|-----|-----|--|
| <i>NSP</i>                     |     |     |     |  |
| Glucose                        | ns  | *** | *** |  |
| Xylose                         | ns  | ns  | ns  |  |
| Arabinose                      | ns  | *** | *   |  |
| Galactose                      | *** | ns  | **  |  |
| Mannose                        | *** | *   | *** |  |
| <i>Minerals &amp; elements</i> |     |     |     |  |
| Si                             | *** | *** | **  |  |
| K                              | **  | ns  | *** |  |
| Ca                             | *** | *** | ns  |  |
| S                              | *** | *   | *** |  |
| Cl                             | o   | *   | *** |  |
| Mg                             | **  | **  | *** |  |
| P                              | *** | ns  | **  |  |
| Na                             | *   | *   | *** |  |
| Fe                             | *** | **  | *   |  |
| Mn                             | **  | *   | *   |  |
| Zn                             | **  | *   | **  |  |
| Cu                             | *** | *   | *** |  |
| <i>Microbiology</i>            |     |     |     |  |
| aerobic mesophilic bacteria    | *** | *** | *   |  |
| yeasts                         | *   | ns  | o   |  |
| moulds                         | *** | ns  | ns  |  |
| lactic acid bacteria           | **  | *** | *** |  |

ADL acid detergent lignin, NFC non-fibre carbohydrates, NSP non-starch polysaccharides. \*\*\*  $p < 0.001$ , \*\*  $p < 0.01$ , \*  $p < 0.05$ , o  $p < 0.1$ , ns not significant.

**Table S4.** Significance of effects on chemical parameters and microbial counts in remoistened inoculated straw (Trials 2 & 3).

|                                | Fungal strain | Storage duration | Strain*duration |
|--------------------------------|---------------|------------------|-----------------|
| pH                             | **            | ***              | ns              |
| Ergosterol                     | **            | ***              | ***             |
| Hemicellulose                  | ns            | **               | ns              |
| Cellulose                      | ns            | **               | ns              |
| ADL                            | ns            | ***              | ns              |
| NFC                            | ***           | ***              | *               |
| <i>Minerals &amp; elements</i> |               |                  |                 |
| Si                             | ***           | *                | ns              |
| K                              | ***           | ***              | *               |
| Ca                             | ***           | *                | ns              |
| S                              | ***           | ***              | ns              |
| Cl                             | ***           | ***              | **              |
| Mg                             | o             | ***              | **              |
| P                              | **            | ns               | o               |
| Na                             | ***           | **               | ***             |
| Fe                             | **            | ns               | **              |
| Mn                             | ***           | *                | ns              |
| Zn                             | *             | **               | **              |
| Cu                             | *             | **               | o               |
| <i>Microbiology</i>            |               |                  |                 |
| aerobic mesophilic bacteria    | ns            | ***              | o               |
| yeasts                         | ns            | ns               | ns              |
| moulds                         | *             | ***              | *               |

lactic acid bacteria                      \*\*\*                      o                      ns

ADL acid detergent lignin, NFC non-fibre carbohydrates. \*\*\*  $p < 0.001$ , \*\*  $p < 0.01$ , \*  $p < 0.05$ , o  $p < 0.1$ , ns not significant.

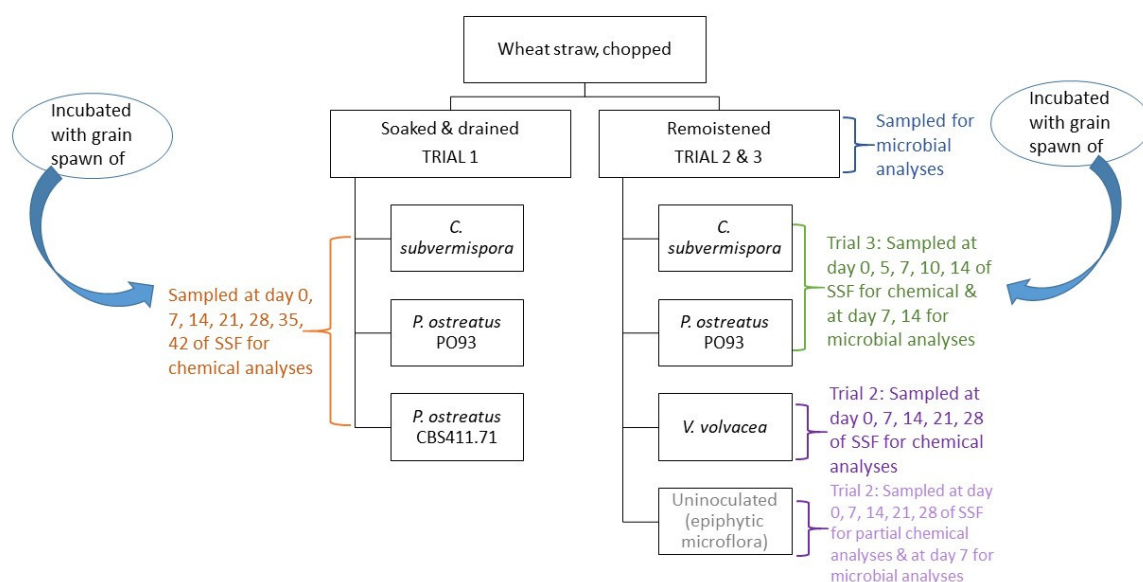

**Figure S1.** Flowchart of the experiments carried out in the study. SSF Solid-state fermentation.

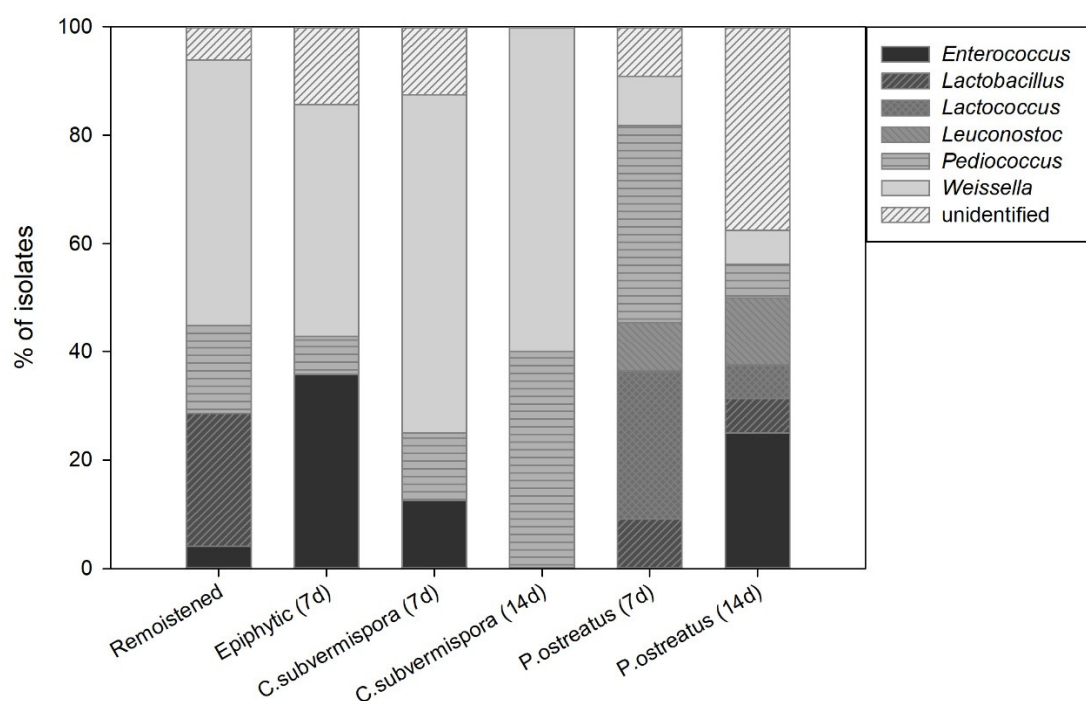

**Figure S2.** Distribution of LAB genera (in % of isolates) isolated from the remoistened straw inoculated with different fungi after 0, 7 and 14 d of incubation.
